# Supplementary material for: Electrophilic Nrf2 activators and itaconate inhibit inflammation at low dose and promote IL-1β production and inflammatory apoptosis at high dose
Source: PubMed Central journal article supplement — Redox Biol. 2020 Jul 21;36:101647. doi: 10.1016/j.redox.2020.101647 (PMC7387846; doi:10.1016/j.redox.2020.101647), 2020-07-21
Supplement: mmc2.pdf [file mmc2.pdf]

# Supplementary Tables

**Supplementary Table 1. Sequences of primers used for qRT-PCR.**

| Target gene                       | Primer sequences                                                                |
|-----------------------------------|---------------------------------------------------------------------------------|
| <i>IL-1<math>\beta</math></i>     | Forward: 5'-CCACCTTTTGACAGTGATGAG-3'<br>Reverse: 5'-CCAGGTCAAAGGTTTGGAAAGC-3'   |
| <i>Nqo1</i>                       | Forward: 5'-TTACAGCATTGGCCCACTC-3'<br>Reverse: 5'-GGCTGCTTGGAGCAAATAG-3'        |
| <i>Hsf1</i>                       | Forward: 5'-GGACAGGAACAGCTCCTTGA-3'<br>Reverse: 5'-TCCTGTTTCCCCTTCATCAG-3'      |
| <i>Hspa1a</i>                     | Forward: 5'-ATGGACAAGGCGCAGATCC-3'<br>Reverse: 5'-CTCCGACTTGTCCCCCAT-3'         |
| <i>Hspb8</i>                      | Forward: 5'-AGACCCCTTTCGGGACTCA-3'<br>Reverse: 5'-GGCTGTCAAGTCGTCTGGAA-3'       |
| <i>Tbp</i><br>(housekeeping gene) | Forward: 5'-TTGACCTAAAGACCATTGCACTTC-3'<br>Reverse: 5'-TTCTCATGATGACTGCAGCAA-3' |
